# Supplementary material
Source: PubMed Central journal article supplement (PMC3886575)
Supplement: NIHMS531678-supplement-Supp_Appendix.pdf [file NIHMS531678-supplement-Supp_Appendix.pdf]

## Supplementary material to

### Estimation and Testing Based on Data Subject to Measurement Errors: From

### Parametric to Non-Parametric Likelihood Methods

Albert Vexler<sup>a\*</sup>, Wan-Min Tsai<sup>a</sup> and Yaakov Malinovsky<sup>b</sup>

## Appendix

### A1. Parametric likelihood based on the hybrid design

Under the normal assumption, the log likelihood function based on the pooled-unpooled data is in the form of

$$l_H(Z|\mu_x, \sigma_x^2, \sigma_m^2) = -\sum_{i=1}^{n_p} \frac{(Z_i^p - \mu_x)^2}{2(\sigma_m^2 + \sigma_x^2/p)} - \sum_{j=1}^{n_{up}} \frac{(Z_j - \mu_x)^2}{2(\sigma_m^2 + \sigma_x^2)} \\ - \frac{n_p}{2} \log \left( 2\pi \left( \sigma_m^2 + \frac{\sigma_x^2}{p} \right) \right) - \frac{n_{up}}{2} \log(2\pi(\sigma_m^2 + \sigma_x^2)).$$

Taking the corresponding first derivatives of the log likelihood function  $l_H(Z|\mu_x, \sigma_x^2, \sigma_m^2)$  yields

$$\frac{\partial l_H}{\partial \mu_x} = \sum_{i=1}^{n_p} \frac{Z_i^p - \mu_x}{\sigma_m^2 + \sigma_x^2/p} + \sum_{j=1}^{n_{up}} \frac{Z_j - \mu_x}{\sigma_m^2 + \sigma_x^2}, \\ \frac{\partial l_H}{\partial \sigma_x^2} = \sum_{i=1}^{n_p} \frac{(Z_i^p - \mu_x)^2}{2p(\sigma_m^2 + \sigma_x^2/p)^2} + \sum_{j=1}^{n_{up}} \frac{(Z_j - \mu_x)^2}{2(\sigma_m^2 + \sigma_x^2)^2}$$

---

<sup>a</sup> Department of Biostatistics, The State University of New York, Buffalo, NY 14214, U.S.A.

<sup>b</sup> Division of Epidemiology, Statistics and Prevention Research, National Institute of Child Health and Human Development, NIH/DHHS, 6100 Executive Blvd., Bethesda, MD 20892, USA

\* Correspondence to: Albert Vexler, Department of Biostatistics, The State University of New York, Buffalo, NY 14214, U.S.A.

† Email: avexler@buffalo.edu

$$-\frac{n_p}{2p(\sigma_m^2 + \sigma_x^2/p)} - \frac{n_{up}}{2(\sigma_m^2 + \sigma_x^2)},$$

$$\frac{\partial l_H}{\partial \sigma_m^2} = \sum_{i=1}^{n_p} \frac{(Z_i^p - \mu_x)^2}{2(\sigma_m^2 + \sigma_x^2/p)^2} + \sum_{j=1}^{n_{up}} \frac{(Z_j - \mu_x)^2}{2(\sigma_m^2 + \sigma_x^2)^2} - \frac{n_p}{2(\sigma_m^2 + \sigma_x^2/p)} - \frac{n_{up}}{2(\sigma_m^2 + \sigma_x^2)}.$$

Let these first derivatives be equal to zero. Then we can obtain the following system of equations whose solutions are the maximum likelihood estimators.

$$\hat{\mu}_x = \frac{(\hat{\sigma}_m^2 + \hat{\sigma}_x^2) \sum_{i=1}^{n_p} Z_i^p + (\hat{\sigma}_m^2 + \hat{\sigma}_x^2/p) \sum_{j=1}^{n_{up}} Z_j}{n_{up}(\hat{\sigma}_m^2 + \hat{\sigma}_x^2/p) + n_p(\hat{\sigma}_m^2 + \hat{\sigma}_x^2)},$$

$$\hat{\sigma}_x^2 = \frac{p}{p-1} \left[ \frac{\sum_{j=1}^{n_{up}} (Z_j - \hat{\mu}_x)^2}{n_{up}} - \frac{\sum_{i=1}^{n_p} (Z_i^p - \hat{\mu}_x)^2}{n_p} \right],$$

$$\hat{\sigma}_m^2 = \frac{\sum_{i=1}^{n_p} (Z_i^p - \hat{\mu}_x)^2}{n_p} - \frac{\hat{\sigma}_x^2}{p}.$$

To present the matrix  $\mathbf{I}$ , we obtain the second derivatives of the log likelihood function as follows:

$$\frac{\partial^2 l_H}{\partial (\mu_x)^2} = -\frac{n_p}{\sigma_m^2 + \sigma_x^2/p} - \frac{n_{up}}{\sigma_m^2 + \sigma_x^2},$$

$$\frac{\partial^2 l_H}{\partial (\sigma_x^2)^2} = -\frac{\sum_{i=1}^{n_p} (Z_i^p - \mu_x)^2}{p^2(\sigma_m^2 + \sigma_x^2/p)^3} - \frac{\sum_{j=1}^{n_{up}} (Z_j - \mu_x)^2}{(\sigma_m^2 + \sigma_x^2)^3} + \frac{n_p}{2p^2(\sigma_m^2 + \sigma_x^2/p)^2} + \frac{n_{up}}{2(\sigma_m^2 + \sigma_x^2)^2},$$

$$\frac{\partial^2 l_H}{\partial (\sigma_m^2)^2} = -\frac{\sum_{i=1}^{n_p} (Z_i^p - \mu_x)^2}{(\sigma_m^2 + \sigma_x^2/p)^3} - \frac{\sum_{j=1}^{n_{up}} (Z_j - \mu_x)^2}{(\sigma_m^2 + \sigma_x^2)^3} + \frac{n_p}{2(\sigma_m^2 + \sigma_x^2/p)^2} + \frac{n_{up}}{2(\sigma_m^2 + \sigma_x^2)^2},$$

$$\frac{\partial^2 l_H}{\partial \mu_x \partial \sigma_x^2} = -\sum_{i=1}^{n_p} \frac{Z_i^p - \mu_x}{p(\sigma_m^2 + \sigma_x^2/p)^2} - \sum_{j=1}^{n_{up}} \frac{Z_j - \mu_x}{(\sigma_m^2 + \sigma_x^2)^2},$$

$$\frac{\partial^2 l_H}{\partial \mu_x \partial \sigma_m^2} = -\sum_{i=1}^{n_p} \frac{Z_i^p - \mu_x}{(\sigma_m^2 + \sigma_x^2/p)^2} - \sum_{j=1}^{n_{up}} \frac{Z_j - \mu_x}{(\sigma_m^2 + \sigma_x^2)^2},$$

$$\frac{\partial^2 l_H}{\partial \sigma_x^2 \partial \sigma_m^2} = -\frac{\sum_{i=1}^{n_p} (Z_i^p - \mu_x)^2}{p(\sigma_m^2 + \sigma_x^2/p)^3} - \frac{\sum_{j=1}^{n_{up}} (Z_j - \mu_x)^2}{(\sigma_m^2 + \sigma_x^2)^3} + \frac{n_p}{2p(\sigma_m^2 + \sigma_x^2/p)^2} + \frac{n_{up}}{2(\sigma_m^2 + \sigma_x^2)^2}.$$

The Fisher Information matrix  $\mathbf{I}$  can be calculated as

$$\mathbf{I} = -\lim_{N \rightarrow \infty} \frac{1}{N} E \begin{bmatrix} \frac{\partial^2 l_H}{\partial (\mu_x)^2} & \frac{\partial^2 l_H}{\partial \mu_x \partial \sigma_x^2} & \frac{\partial^2 l_H}{\partial \mu_x \partial \sigma_m^2} \\ \frac{\partial^2 l_H}{\partial \sigma_x^2 \partial \mu_x} & \frac{\partial^2 l_H}{\partial (\sigma_x^2)^2} & \frac{\partial^2 l_H}{\partial \sigma_x^2 \partial \sigma_m^2} \\ \frac{\partial^2 l_H}{\partial \sigma_m^2 \partial \mu_x} & \frac{\partial^2 l_H}{\partial \sigma_m^2 \partial \sigma_x^2} & \frac{\partial^2 l_H}{\partial (\sigma_m^2)^2} \end{bmatrix}$$

$$= \begin{bmatrix} \frac{\alpha}{\sigma_m^2 + \sigma_x^2/p} + \frac{1-\alpha}{\sigma_m^2 + \sigma_x^2} & 0 & 0 \\ 0 & \frac{\alpha}{2p^2(\sigma_m^2 + \sigma_x^2/p)^2} + \frac{1-\alpha}{2(\sigma_m^2 + \sigma_x^2)^2} & \frac{\alpha}{2p(\sigma_m^2 + \sigma_x^2/p)^2} + \frac{1-\alpha}{2(\sigma_m^2 + \sigma_x^2)^2} \\ 0 & \frac{\alpha}{2p(\sigma_m^2 + \sigma_x^2/p)^2} + \frac{1-\alpha}{2(\sigma_m^2 + \sigma_x^2)^2} & \frac{\alpha}{2(\sigma_m^2 + \sigma_x^2/p)^2} + \frac{1-\alpha}{2(\sigma_m^2 + \sigma_x^2)^2} \end{bmatrix}.$$

The asymptotic distribution of the maximum likelihood estimators (1) can be derived

$$\sqrt{N} \begin{pmatrix} \hat{\mu}_x - \mu_x \\ \hat{\sigma}_x^2 - \sigma_x^2 \\ \hat{\sigma}_m^2 - \sigma_m^2 \end{pmatrix} \sim MVN(\mathbf{0}, \mathbf{I}^{-1}).$$

## A2. The asymptotic distribution of the log empirical likelihood ratio test

### A2.1. The repeated measurements

Under the null hypothesis, the empirical likelihood function based on repeated measures data is

$$L_R(\mu_x) = \prod_{i=1}^t \frac{1}{t} \frac{1}{1 + \lambda(\bar{Z}_i - \mu_x)}.$$

Thus, the EL ratio based on repeated measures data is given by

$$EL_R = \frac{\max_{p: H_1} \prod_{i=1}^t p_i}{L_R(\mu_x)} = \prod_{i=1}^t \frac{\frac{1}{t}}{\frac{1}{t} \frac{1}{1 + \lambda(\bar{Z}_i - \mu_x)}} = \prod_{i=1}^t 1 + \lambda(\bar{Z}_i - \mu_x),$$

where  $\lambda$  is a root of

$$\sum_{i=1}^t \frac{\bar{Z}_i - \mu_x}{1 + \lambda(\bar{Z}_i - \mu_x)} = 0.$$

By applying the Taylor expansion, we have

$$\sum_{i=1}^t \frac{\bar{Z}_i - \mu_x}{1 + \lambda(\bar{Z}_i - \mu_x)} = \sum_{i=1}^t (\bar{Z}_i - \mu_x) - \lambda \sum_{i=1}^t (\bar{Z}_i - \mu_x)^2 + R_1 = 0,$$

where  $R_1$  is a remainder term (for details, see Owen [25], Vexler et al. [26]).

Therefore,

$$\lambda \approx \frac{\sum_{i=1}^t (\bar{Z}_i - \mu_x)}{\sum_{i=1}^t (\bar{Z}_i - \mu_x)^2}, \text{ as } t \rightarrow \infty.$$

Now consider the log empirical likelihood ratio statistic in the form of

$$l_R(\mu_x) = 2 \log EL_R = 2 \sum_{i=1}^t \log [1 + \lambda(\bar{Z}_i - \mu_x)].$$

Again, by applying the Taylor expansion with  $\lambda(\bar{Z}_i - \mu_x)$  around zero, we obtain

$$l_R(\mu_x) = 2 \sum_{i=1}^t \left[ \lambda(\bar{Z}_i - \mu_x) - \frac{\lambda^2}{2} (\bar{Z}_i - \mu_x)^2 + R_2 \right],$$

where  $R_2$  is a remainder term (for details, see Owen [25], Vexler et al. [26]).

Substituting the approximate solution of  $\lambda$  that we obtained yields

$$l_R(\mu_x) \approx 2 \frac{[\sum_{i=1}^t (\bar{Z}_i - \mu_x)]^2}{\sum_{i=1}^t (\bar{Z}_i - \mu_x)^2} - \frac{[\sum_{i=1}^t (\bar{Z}_i - \mu_x)]^2}{\sum_{i=1}^t (\bar{Z}_i - \mu_x)^2} = \left[ \frac{\sum_{i=1}^t (\bar{Z}_i - \mu_x)}{\sqrt{\sum_{i=1}^t (\bar{Z}_i - \mu_x)^2}} \right]^2,$$

where

$$\frac{\sum_{i=1}^t (\bar{Z}_i - \mu_x)}{\sqrt{\sum_{i=1}^t (\bar{Z}_i - \mu_x)^2}} \xrightarrow{p} N(0,1), \text{ as } t \rightarrow \infty.$$

Hence,

$$l_R(\mu_x) \approx \left[ \frac{\sum_{i=1}^t (\bar{Z}_i - \mu_x)}{\sqrt{\sum_{i=1}^t (\bar{Z}_i - \mu_x)^2}} \right]^2 \xrightarrow{p} \chi_1^2, \text{ as } t \rightarrow \infty.$$

Therefore, we complete to outline the proof of Proposition 3.2.1.

## A2.2 The hybrid design

In a similar manner to Section A2.1., we present the empirical likelihood ratio based on the pooled-unpooled data in the form of

$$\begin{aligned} EL_H &= \frac{\max_{p:H_1} \prod_{i=1}^{n_p} p_i \prod_{j=1}^{n_{up}} q_j}{L_H(\mu_x)} = \left[ \prod_{i=1}^{n_p} \frac{\frac{1}{n_p}}{\frac{1}{n_p} \frac{1}{1 + \lambda_1(Z_i^p - \mu_x)}} \right] \left[ \prod_{j=1}^{n_{up}} \frac{\frac{1}{n_{up}}}{\frac{1}{n_{up}} \frac{1}{1 + \lambda_2(Z_j - \mu_x)}} \right] \\ &= \left[ \prod_{i=1}^{n_p} 1 + \lambda_1(Z_i^p - \mu_x) \right] \left[ \prod_{j=1}^{n_{up}} 1 + \lambda_2(Z_j - \mu_x) \right], \end{aligned}$$

where  $\lambda_1$  and  $\lambda_2$  are roots of

$$\sum_{i=1}^{n_p} \frac{(Z_i^p - \mu_x)}{1 + \lambda_1(Z_i^p - \mu_x)} = 0, \quad \sum_{j=1}^{n_{up}} \frac{(Z_j - \mu_x)}{1 + \lambda_2(Z_j - \mu_x)} = 0,$$

respectively.

By applying the Taylor expansion, we have

$$\sum_{i=1}^{n_p} \frac{(Z_i^p - \mu_x)}{1 + \lambda_1(Z_i^p - \mu_x)} = \sum_{i=1}^{n_p} (Z_i^p - \mu_x) - \lambda_1 \sum_{i=1}^{n_p} (Z_i^p - \mu_x)^2 + R_1 = 0,$$

where  $R_1$  is a remainder term (for details, see Owen [25], Vexler et al. [26]).

Consequently,

$$\lambda_1 \approx \frac{\sum_{i=1}^{n_p} (Z_i^p - \mu_x)}{\sum_{i=1}^{n_p} (Z_i^p - \mu_x)^2}, \text{ as } n_p \rightarrow \infty.$$

Similarly, one can obtain

$$\lambda_2 \approx \frac{\sum_{j=1}^{n_{up}} (Z_j - \mu_x)}{\sum_{j=1}^{n_{up}} (Z_j - \mu_x)^2}, \text{ as } n_{up} \rightarrow \infty.$$

Now consider the log EL ratio statistic,  $l_H(\mu_x) = 2 \log EL_H$ , presented in the equation (3).

By applying the Taylor expansion with  $\lambda_1(Z_i^p - \mu_x)$  and  $\lambda_2(Z_j - \mu_x)$  around zeros, we obtain

$$l_H(\mu_x) = 2 \sum_{i=1}^{n_p} [\lambda_1(Z_i^p - \mu_x) - \frac{\lambda_1^2}{2} (Z_i^p - \mu_x)^2 + R_2] +$$

$$2 \sum_{j=1}^{n_{up}} [\lambda_2(Z_j - \mu_x) - \frac{\lambda_2^2}{2} (Z_j - \mu_x)^2 + R_3],$$

where  $R_2$  and  $R_3$  are remainder terms (for details, see Owen [25], Vexler et al. [26]).

Substituting the approximate solutions of  $\lambda_1$  and  $\lambda_2$  yields

$$l_H(\mu_x) \approx 2 \frac{[\sum_{i=1}^{n_p} (Z_i^p - \mu_x)]^2}{\sum_{i=1}^{n_p} (Z_i^p - \mu_x)^2} - \frac{[\sum_{i=1}^{n_p} (Z_i^p - \mu_x)]^2}{\sum_{i=1}^{n_p} (Z_i^p - \mu_x)^2} + 2 \frac{[\sum_{j=1}^{n_{up}} (Z_j - \mu_x)]^2}{\sum_{j=1}^{n_{up}} (Z_j - \mu_x)^2}$$

$$- \frac{[\sum_{i=1}^{n_{up}} Z_j - \mu_x]^2}{\sum_{i=1}^{n_{up}} (Z_j - \mu_x)^2} = \left[ \frac{\sum_{i=1}^{n_p} (Z_i^p - \mu_x)}{\sqrt{\sum_{i=1}^{n_p} (Z_i^p - \mu_x)^2}} \right]^2 + \left[ \frac{\sum_{j=1}^{n_{up}} (Z_j - \mu_x)}{\sqrt{\sum_{i=1}^{n_{up}} (Z_j - \mu_x)^2}} \right]^2,$$

where

$$\frac{\sum_{i=1}^{n_p} (Z_i^p - \mu_x)}{\sqrt{\sum_{i=1}^{n_p} (Z_i^p - \mu_x)^2}} \xrightarrow{p} N(0,1) \text{ as } n_p \rightarrow \infty, \quad \frac{\sum_{j=1}^{n_{up}} (Z_j - \mu_x)}{\sqrt{\sum_{i=1}^{n_{up}} (Z_j - \mu_x)^2}} \xrightarrow{p} N(0,1) \text{ as } n_{up} \rightarrow \infty.$$

Hence,

$$\begin{aligned}
& 2 \sum_{i=1}^{n_p} \log[1 + \lambda_1(Z_i^p - \mu_x)] + 2 \sum_{j=1}^{n_{up}} \log[1 + \lambda_2(Z_j - \mu_x)] \\
& \approx \left[ \frac{\sum_{i=1}^{n_p} (Z_i^p - \mu_x)}{\sqrt{\sum_{i=1}^{n_p} (Z_i^p - \mu_x)^2}} \right]^2 + \left[ \frac{\sum_{j=1}^{n_{up}} (Z_j - \mu_x)}{\sqrt{\sum_{j=1}^{n_{up}} (Z_j - \mu_x)^2}} \right]^2 \xrightarrow{p} \chi_2^2 \text{ as } n_p, n_{up} \rightarrow \infty.
\end{aligned}$$

Thus, we complete the sketchy proof of Proposition 3.3.1.
